## CORRECTION

# Correction: Sequential analysis of myocardial gene expression with phenotypic change: Use of cross-platform concordance to strengthen biologic relevance

Lee S. Toni, Ian A. Carroll, Kenneth L. Jones, Jessica A. Schwisow, Wayne A. Minobe, Erin M. Rodriguez, Natasha L. Altman, Brian D. Lowes, Edward M. Gilbert, Peter M. Buttrick, David P. Kao, Michael R. Bristow

There are a number of errors in the caption for [Fig 3](#), “Ingenuity pathway analysis of concordantly changed mRNAs from Table 3,” panels A-D. Please see the complete, correct [Fig 3](#) caption here.

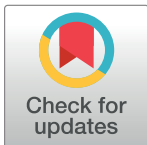

## OPEN ACCESS

**Citation:** Toni LS, Carroll IA, Jones KL, Schwisow JA, Minobe WA, Rodriguez EM, et al. (2019) Correction: Sequential analysis of myocardial gene expression with phenotypic change: Use of cross-platform concordance to strengthen biologic relevance. PLoS ONE 14(10): e0224389. <https://doi.org/10.1371/journal.pone.0224389>

**Published:** October 22, 2019

**Copyright:** © 2019 Toni et al. This is an open access article distributed under the terms of the [Creative Commons Attribution License](#), which permits unrestricted use, distribution, and reproduction in any medium, provided the original author and source are credited.

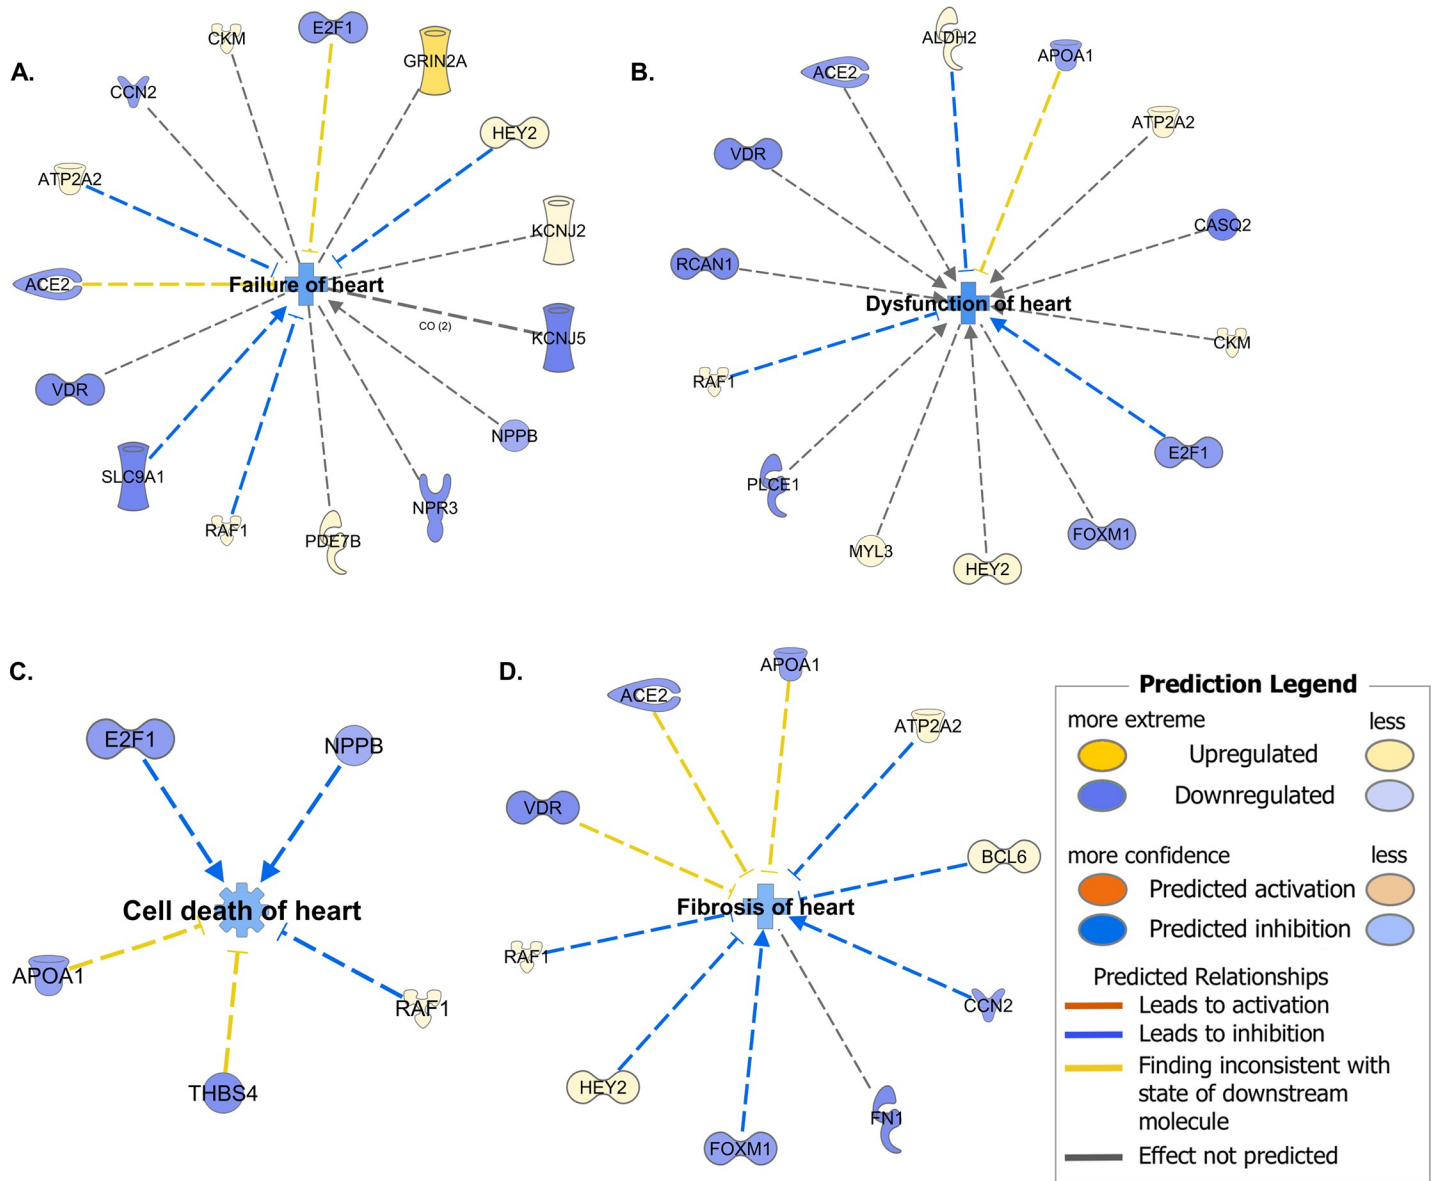

**Fig 3. Ingenuity pathway analysis of concordantly changed mRNAs from Table 3.** Colors indicate predicted effect of transcript on biological function or disease in center of circular diagram. (A) Failure of heart. (B) Dysfunction of heart. (C) Cell death of heart. (D) Fibrosis of heart.

<https://doi.org/10.1371/journal.pone.0224389.g001>

The caption listed within Supporting Information file [S1 Text](#) is incorrect. Additionally, there are a number of errors in the gene names in [S2 Table](#), [S3 Table](#) and [S4 Table](#). Please view the correct [S1 Text](#), [S2 Table](#), [S3 Table](#) and [S4 Table](#) below.

Note, there is an error in the caption for [S3 Table](#). Please see the complete, correct [S3 Table](#) caption below.

### Supporting information

**S1 Text. List of abbreviations and acronyms.**  
(DOCX)

**S2 Table. Up or downregulated genes within the R and R/NR analyses, microarray or RNA-Seq measurements in the S-R cohort.**

(DOCX)

**S3 Table. Biologic categories of 299 concordant gene expression changes identified in the R/NR analysis by microarray and RNA-Seq in the S-R cohort (Table 3), and RT-qPCR and RNA-Seq in the S-R cohort (Table 2).**

(DOCX)

**S4 Table. Up or downregulated genes within the R and R/NR analyses, microarray measurements in the A-S cohort.**

(DOCX)

## Reference

1. Toni LS, Carroll IA, Jones KL, Schwisow JA, Minobe WA, Rodriguez EM, et al. (2019) Sequential analysis of myocardial gene expression with phenotypic change: Use of cross-platform concordance to strengthen biologic relevance. PLoS ONE 14(8): e0221519. <https://doi.org/10.1371/journal.pone.0221519> PMID: [31469842](https://pubmed.ncbi.nlm.nih.gov/31469842/)
